# Supplementary material
Source: publisher site journal article supplement (https://journals.iucr.org/services/coeditors/meetings/jmb/2024/AppendixG.pdf)
Supplement: Supplementary file 1 [file AppendixG.pdf]

## APPENDIX G

### Lead and Feature Articles and Topical Reviews (2014 to date)

| Article title                                                                                                         | Author(s)                                                                                                                                                                                                                                                                                                                                                                                                                                                                                                                                                                                                                                                                                                                                                                                                                                                                                                    | Journal | Issue        | Citations (WoS) | Scopus | Altmetric | Views | Category | Access | Keywords                                                                                                       | Review scores |
|-----------------------------------------------------------------------------------------------------------------------|--------------------------------------------------------------------------------------------------------------------------------------------------------------------------------------------------------------------------------------------------------------------------------------------------------------------------------------------------------------------------------------------------------------------------------------------------------------------------------------------------------------------------------------------------------------------------------------------------------------------------------------------------------------------------------------------------------------------------------------------------------------------------------------------------------------------------------------------------------------------------------------------------------------|---------|--------------|-----------------|--------|-----------|-------|----------|--------|----------------------------------------------------------------------------------------------------------------|---------------|
| Crystal structure refinement with SHELXL                                                                              | G. M. Sheldrick                                                                                                                                                                                                                                                                                                                                                                                                                                                                                                                                                                                                                                                                                                                                                                                                                                                                                              | C       | January 2015 | 42702           | 15852  | 34        | 64650 | fe       | Open   | SHELXL; crystal structure refinement; X-ray and neutron diffraction; SHREDCIF                                  |               |
| The Cambridge Structural Database                                                                                     | C. R. Groom, I. J. Bruno, M. P. Lightfoot and S. C. Ward                                                                                                                                                                                                                                                                                                                                                                                                                                                                                                                                                                                                                                                                                                                                                                                                                                                     | B       | April 2016   | 6579            | 6575   | 37        | 24665 | fe       | Open   | Cambridge Structural Database; CIF archive; open data; crystal structure database                              | 5.0 (5,5)     |
| PLATON SQUEEZE: a tool for the calculation of the disordered solvent contribution to the calculated structure factors | A. L. Spek                                                                                                                                                                                                                                                                                                                                                                                                                                                                                                                                                                                                                                                                                                                                                                                                                                                                                                   | C       | January 2015 | 2895            | 2825   | 15        | 19453 | fe       |        | SQUEEZE; PLATON; embedded solvent; disorder                                                                    |               |
| Macromolecular structure determination using X-rays, neutrons and electrons: recent developments in Phenix            | D. Liebschner, P. V. Afonine, M. L. Baker, G. Bunkóczi, V. B. Chen, T. I. Croll, B. Hintze, L.-W. Hung, S. Jain, A. J. McCoy, N. W. Moriarty, R. D. Oeffner, B. K. Poon, M. G. Prisant, R. J. Read, J. S. Richardson, D. C. Richardson, M. D. Sammito, O. V. Sobolev, D. H. Stockwell, T. C. Terwilliger, A. G. Urzhumtsev, L. L. Videau, C. J. Williams and P. D. Adams                                                                                                                                                                                                                                                                                                                                                                                                                                                                                                                                     | D       | October 2019 | 2206            | 2651   | 52        | 19473 | fe       | Open   | Phenix; automation; macromolecular crystallography; cryo-EM; X-rays; neutrons; diffraction; Python; cctbx; C++ | 5.0 (5)       |
| Report on the sixth blind test of organic crystal structure prediction methods                                        | A. M. Reilly, R. I. Cooper, C. S. Adjiman, S. Bhattacharya, A. D. Boese, J. G. Brandenburg, P. J. Bygrave, R. Bylsma, J. E. Campbell, R. Car, D. H. Case, R. Chadha, J. C. Cole, K. Cosburn, H. M. Cuppen, F. Curtis, G. M. Day, R. A. DiStasio Jr, A. Dzyabchenko, B. P. van Eijck, D. M. Elking, J. A. van den Ende, J. C. Facelli, M. B. Ferraro, L. Fusti-Molnar, C.-A. Gatsiou, T. S. Gee, R. de Gelder, L. M. Ghiringhelli, H. Goto, S. Grimme, R. Guo, D. W. M. Hofmann, J. Hoja, R. K. Hylton, L. Iuzzolino, W. Jankiewicz, D. T. de Jong, J. Kendrick, N. J. J. de Klerk, H.-Y. Ko, L. N. Kuleshova, X. Li, S. Lohani, F. J. J. Leusen, A. M. Lund, J. Lv, Y. Ma, N. Marom, A. E. Masunov, P. McCabe, D. P. McMahon, H. Meeke, M. P. Metz, A. J. Misquitta, S. Mohamed, B. Monserrat, R. J. Needs, M. A. Neumann, J. Nyman, S. Obata, H. Oberhofer, A. R. Oganov, A. M. Orendt, G. I. Pagola, C. C. | B       | August 2016  | 418             | 419    | 37        | 27037 | fe       | Open   | crystal structure prediction; polymorphism; lattice energies; Cambridge Structural Database                    | 4.0 (4,4)     |

| Article title                                                                   | Author(s)                                                                                                                                                                                                                                                                                                                                                          | Journal | Issue         | Citations (WoS) | Scopus | Altmetric | Views | Category | Access | Keywords                                                                                                                                                                           | Review scores |
|---------------------------------------------------------------------------------|--------------------------------------------------------------------------------------------------------------------------------------------------------------------------------------------------------------------------------------------------------------------------------------------------------------------------------------------------------------------|---------|---------------|-----------------|--------|-----------|-------|----------|--------|------------------------------------------------------------------------------------------------------------------------------------------------------------------------------------|---------------|
|                                                                                 | Pantelides, C. J. Pickard, R. Podeszwa, L. S. Price, S. L. Price, A. Pulido, M. G. Read, K. Reuter, E. Schneider, C. Schober, G. P. Shields, P. Singh, I. J. Sugden, K. Szalewicz, C. R. Taylor, A. Tkatchenko, M. E. Tuckerman, F. Vacarro, M. Vasileiadis, A. Vazquez-Mayagoitia, L. Vogt, Y. Wang, R. E. Watson, G. A. de Wijs, J. Yang, Q. Zhu and C. R. Groom |         |               |                 |        |           |       |          |        |                                                                                                                                                                                    |               |
| Crystalline metal-organic frameworks (MOFs): synthesis, structure and function  | C. Dey, T. Kundu, B. P. Biswal, A. Mallick and R. Banerjee                                                                                                                                                                                                                                                                                                         | B       | February 2014 | 234             | 261    | 7         | 33268 | fe       |        | metal-organic frameworks; crystal engineering; microporous materials; synthetic methods                                                                                            |               |
| Serial femtosecond crystallography: the first five years                        | I. Schlichting                                                                                                                                                                                                                                                                                                                                                     | IUCrJ   | March 2015    | 229             | 233    | 17        | 24452 | fe       | Open   | serial femtosecond crystallography; SFX; X-ray lasers; FELs; time-resolved crystallography; microcrystals; radiation damage                                                        |               |
| Advanced grazing-incidence techniques for modern soft-matter materials analysis | A. Hexemer and P. Müller-Buschbaum                                                                                                                                                                                                                                                                                                                                 | IUCrJ   | January 2015  | 183             | 188    | 2         | 21266 | fe       | Open   | grazing-incidence techniques; GISAXS; GIWAXS; resonant soft X-ray scattering; GISANS; morphology; soft matter                                                                      | 4.0 (4)       |
| EXAFS and XANES analysis of oxides at the nanoscale                             | A. Kuzmin and J. Chaboy                                                                                                                                                                                                                                                                                                                                            | IUCrJ   | November 2014 | 166             | 167    | 5         | 16205 | fe       | Open   | EXAFS; XANES; oxide nanomaterials; nanocrystalline materials                                                                                                                       | 4.0 (4)       |
| XFELs for structure and dynamics in biology                                     | J. C. H. Spence                                                                                                                                                                                                                                                                                                                                                    | IUCrJ   | July 2017     | 119             | 125    | 19        | 21064 | fe       | Open   | X-ray lasers; XFELs; biology; structure; dynamics                                                                                                                                  | 4.0 (5,4,3)   |
| Supramolecular interactions in the solid state                                  | G. Resnati, E. Boldyreva, P. Bombicz and M. Kawano                                                                                                                                                                                                                                                                                                                 | IUCrJ   | November 2015 | 100             | 100    | 1         | 9415  | fe       | Open   | intermolecular interactions; crystal engineering; self-assembly; halogen bonding; polymorphism; kinetic assembly; coordination polymers; non-ambient conditions; phase transitions |               |
| NMR crystallography: structure and properties of materials from                 | D. L. Bryce                                                                                                                                                                                                                                                                                                                                                        | IUCrJ   | July 2017     | 97              | 100    | 6         | 9066  | tr       | Open   | Nuclear magnetic resonance; solid-state                                                                                                                                            | 4.0 (4,4)     |

| Article title                                                                                              | Author(s)                                                                                                                                                                                              | Journal | Issue          | Citations (WoS) | Scopus | Altmetric | Views | Category | Access | Keywords                                                                                                                                     | Review scores |
|------------------------------------------------------------------------------------------------------------|--------------------------------------------------------------------------------------------------------------------------------------------------------------------------------------------------------|---------|----------------|-----------------|--------|-----------|-------|----------|--------|----------------------------------------------------------------------------------------------------------------------------------------------|---------------|
| solid-state nuclear magnetic resonance observables                                                         |                                                                                                                                                                                                        |         |                |                 |        |           |       |          |        | NMR; NMR crystallography; dynamics; noncovalent interactions                                                                                 |               |
| Sub-atomic resolution X-ray crystallography and neutron crystallography: promise, challenges and potential | M. P. Blakeley, S. S. Hasnain and S. V. Antonyuk                                                                                                                                                       | IUCrJ   | July 2015      | 95              | 92     | 16        | 14493 | tr       | Open   | neutron; X-ray; hydrogen; proton; protonation states; radiation damage; redox biology; proton coupling; electron transfer; X-ray laser; XFEL | 3.3 (5,4,1)   |
| The HEPS project                                                                                           | Y. Jiao, G. Xu, X.-H. Cui, Z. Duan, Y.-Y. Guo, P. He, D.-H. Ji, J.-Y. Li, X.-Y. Li, C. Meng, Y.-M. Peng, S.-K. Tian, J.-Q. Wang, N. Wang, Y.-Y. Wei, H.-S. Xu, F. Yan, C.-H. Yu, Y.-L. Zhao and Q. Qin | JSR     | November 2018  | 95              | 118    | 2         | 6792  | fe       | Open   | High Energy Photon Source (HEPS); diffraction-limited storage ring; modified hybrid seven-bend achromat                                      | 3.0 (4,2)     |
| Precession electron diffraction - a topical review                                                         | P. A. Midgley and A. S. Eggeman                                                                                                                                                                        | IUCrJ   | January 2015   | 91              | 104    | 2         | 16697 | tr       | Open   | precession electron diffraction (PED); electron crystallography; electron techniques; electron-based structure analysis                      | 4.0 (4,4)     |
| PETRA IV: the ultralow-emittance source project at DESY                                                    | C. G. Schroer, I. Agapov, W. Brefeld, R. Brinkmann, Y.-C. Chae, H.-C. Chao, M. Eriksson, J. Keil, X. Nuel Gavalda, R. Röhlberger, O. H. Seeck, M. Sprung, M. Tischer, R. Wanzenberg and E. Weckert     | JSR     | September 2018 | 84              | 101    | 11        | 8701  | fe       | Open   | PETRA IV; ultralow-emittance source; diffraction-limited storage ring                                                                        | 3.5 (4,3)     |
| Structural studies of metal-organic frameworks under high pressure                                         | S. C. McKellar and S. A. Moggach                                                                                                                                                                       | B       | December 2015  | 82              | 81     | 7         | 17792 | fe       | Free   | high-pressure studies; MOFs; coordination polymers                                                                                           | 3.5 (5,2)     |
| MicroED data collection and processing                                                                     | J. Hattné, F. E. Reyes, B. L. Nannenga, D. Shi, M. J. de la Cruz, A. G. W. Leslie and T. Gonen                                                                                                         | A       | July 2015      | 82              | 87     | 0         | 8589  | fe       | Open   | MicroED; electron diffraction; crystallography; cryo-EM; nanocrystals                                                                        | 3.0 (4,2)     |
| In-cell NMR: a topical review                                                                              | E. Luchinat and L. Banci                                                                                                                                                                               | IUCrJ   | March 2017     | 81              | 86     | 26        | 12392 | tr       | Open   | in-cell NMR; nuclear magnetic resonance; cellular structural biology; cellular environment; protein interactions                             | 4.0 (5,3)     |
| Crystallographic studies of gas sorption in metal-organic frameworks                                       | E. J. Carrington, I. J. Vitórica-Yrezábal and L. Brammer                                                                                                                                               | B       | June 2014      | 80              | 81     | 1         | 9769  | fe       | Open   | metal-organic frameworks; gas sorption; framework flexibility                                                                                |               |

| Article title                                                                                                                                                                 | Author(s)                                                                                                                                                                                                                                                                                                            | Journal | Issue          | Citations (WoS) | Scopus | Altmetric | Views | Category | Access | Keywords                                                                                                                                        | Review scores |
|-------------------------------------------------------------------------------------------------------------------------------------------------------------------------------|----------------------------------------------------------------------------------------------------------------------------------------------------------------------------------------------------------------------------------------------------------------------------------------------------------------------|---------|----------------|-----------------|--------|-----------|-------|----------|--------|-------------------------------------------------------------------------------------------------------------------------------------------------|---------------|
| Compound focusing mirror and X-ray waveguide optics for coherent imaging and nano-diffraction                                                                                 | T. Salditt, M. Osterhoff, M. Krenkel, R. N. Wilke, M. Priebe, M. Bartels, S. Kalbfleisch and M. Sprung                                                                                                                                                                                                               | JSR     | July 2015      | 69              | 68     | 1         | 5349  | fe       | Free   | coherent imaging; nano-diffraction; waveguides; holography                                                                                      | 4.0 (4)       |
| Quasicrystals: What do we know? What do we want to know? What can we know?                                                                                                    | W. Steurer                                                                                                                                                                                                                                                                                                           | A       | January 2018   | 67              | 69     | 32        | 9767  | tr       | Open   | quasicrystals; structure analysis; higher-dimensional crystallography; stability of quasicrystals; quasicrystal growth                          | 3.5 (4,3)     |
| Lytic polysaccharide monooxygenases: a crystallographer's view on a new class of biomass-degrading enzymes                                                                    | K. E. H. Frandsen and L. Lo Leggio                                                                                                                                                                                                                                                                                   | IUCrJ   | November 2016  | 66              | 68     | 9         | 7724  | tr       | Open   | lytic polysaccharide monooxygenases; carbohydrate-modifying enzymes; metalloproteins; copper enzymes; biomass degradation                       |               |
| FemtoSpeX: a versatile optical pump-soft X-ray probe facility with 100 fs X-ray pulses of variable polarization                                                               | K. Holldack, J. Bahrtdt, A. Balzer, U. Bovensiepen, M. Brzhezinskaya, A. Erko, A. Eschenlohr, R. Follath, A. Firsov, W. Frentrup, L. Le Guyader, T. Kachel, P. Kuske, R. Mitzner, R. Müller, N. Pontius, T. Quast, I. Radu, J.-S. Schmidt, C. Schüßler-Langeheine, M. Sperling, C. Stamm, C. Trabant and A. Föhlisch | JSR     | September 2014 | 66              | 69     | 2         | 9282  | la       | Free   | femtosecond X-ray pulses; storage ring; elliptical undulators; slicing; diffractive optics; time-resolved X-ray spectroscopy; ultrafast science | 3.0 (3)       |
| Metadynamics studies of crystal nucleation                                                                                                                                    | F. Giberti, M. Salvalaglio and M. Parrinello                                                                                                                                                                                                                                                                         | IUCrJ   | March 2015     | 62              | 68     | 2         | 15890 | fe       | Open   | crystallization; nucleation; molecular modelling; enhanced sampling; metadynamics                                                               | 3.0 (4,2)     |
| X-ray imaging detectors for synchrotron and XFEL sources                                                                                                                      | T. Hatsui and H. Graafsma                                                                                                                                                                                                                                                                                            | IUCrJ   | May 2015       | 59              | 63     | 5         | 14338 | fe       | Open   | X-ray imaging detectors; hybrid detectors; monolithic detectors; recent detector developments                                                   | 3.0 (3,3)     |
| Bond-length distributions for ions bonded to oxygen: results for the transition metals and quantification of the factors underlying bond-length variation in inorganic solids | O. C. Gagné and F. C. Hawthorne                                                                                                                                                                                                                                                                                      | IUCrJ   | July 2020      | 58              | 57     | 41        | 8626  | la       | Open   | bond-length variation; bond-topological effects; vibronic mixing; pseudo Jahn-Teller effect; materials design                                   | 4.5 (5,4)     |
| Three-dimensional electron diffraction as a complementary technique to powder X-ray                                                                                           | Y. Yun, X. Zou, S. Hovmöller and W. Wan                                                                                                                                                                                                                                                                              | IUCrJ   | March 2015     | 58              | 54     | 3         | 12873 | fe       | Open   | three-dimensional electron diffraction; powder X-ray diffraction;                                                                               | 3.0 (3,3)     |

| Article title                                                                                                 | Author(s)                                                                                                                                           | Journal | Issue          | Citations (WoS) | Scopus | Altmetric | Views | Category | Access | Keywords                                                                                                                            | Review scores |
|---------------------------------------------------------------------------------------------------------------|-----------------------------------------------------------------------------------------------------------------------------------------------------|---------|----------------|-----------------|--------|-----------|-------|----------|--------|-------------------------------------------------------------------------------------------------------------------------------------|---------------|
| diffraction for phase identification and structure solution of powders                                        |                                                                                                                                                     |         |                |                 |        |           |       |          |        | phase identification; structure determination                                                                                       |               |
| Towards understanding $\pi$ -stacking interactions between non-aromatic rings                                 | K. Molčanov and B. Kojić-Prodić                                                                                                                     | IUCrJ   | March 2019     | 55              | 55     | 3         | 10061 | tr       | Open   | $\pi$ -stacking interactions; non-aromatic rings; multicentric bonding; charge                                                      | 4.0 (4,4)     |
| Progress in small-angle scattering from biological solutions at high-brilliance synchrotrons                  | A. T. Tuukkanen, A. Spilotros and D. I. Svergun                                                                                                     | IUCrJ   | September 2017 | 52              | 55     | 15        | 9508  | tr       | Open   | small-angle X-ray scattering; structural modelling; time-resolved SAXS                                                              | 3.3 (4,3,3)   |
| Commissioning and first-year operational results of the MAX IV 3 GeV ring                                     | P. F. Tavares, E. Al-Dmour, Å. Andersson, F. Cullinan, B. N. Jensen, D. Olsson, D. K. Olsson, M. Sjöström, H. Tarawneh, S. Thorin and A. Vorozhtsov | JSR     | September 2018 | 52              | 55     | 5         | 6146  | fe       | Open   | storage ring; synchrotron light source; multibend achromat; MAX IV                                                                  | 4.5 (5,4)     |
| Protein crystallography and drug discovery: recollections of knowledge exchange between academia and industry | T. L. Blundell                                                                                                                                      | IUCrJ   | July 2017      | 51              | 60     | 23        | 17520 | fe       | Open   | protein structure; protein crystallography; fragment-based structure-guided drug discovery; disease; cancer                         | 4.0 (4)       |
| Native SAD is maturing                                                                                        | J. P. Rose, B.-C. Wang and M. S. Weiss                                                                                                              | IUCrJ   | July 2015      | 47              | 41     | 4         | 11372 | fe       | Open   | native SAD; sulfur SAD; accurate data collection; data multiplicity; radiation damage; new instruments; new data-scaling techniques | 4.0 (4,4)     |
| Crystallography of metal-organic frameworks                                                                   | F. Gándara and T. D. Bennett                                                                                                                        | IUCrJ   | November 2014  | 46              | 50     | 5         | 19983 | fe       | Open   | MOFs; non-ambient crystallography; crystal growth                                                                                   | 5.0 (5,5)     |
| Macromolecular ab initio phasing enforcing secondary and tertiary structure                                   | C. Millán, M. Sammito and I. Usón                                                                                                                   | IUCrJ   | January 2015   | 46              | 36     | 2         | 11175 | fe       | Open   | ab initio phasing; $\alpha$ -helices; macromolecular structure; ARCIMBOLDO                                                          | 3.0 (4,2)     |
| Protein microcrystallography using synchrotron radiation                                                      | M. Yamamoto, K. Hirata, K. Yamashita, K. Hasegawa, G. Ueno, H. Ago and T. Kumasaka                                                                  | IUCrJ   | September 2017 | 45              | 40     | 13        | 7146  | tr       | Open   | protein microcrystallography; multi-point data collection; multi-crystal data collection; serial synchrotron crystallography        | 3.0 (4,3,2)   |
| Aperiodic crystals and                                                                                        | T. Janssen and A. Janner                                                                                                                            | B       | August         | 45              | 46     | 3         | 10157 | la       | Free   | aperiodic crystals;                                                                                                                 | 4.0           |

| Article title                                                                                                         | Author(s)                                                                                                                                                                                                                                                                                                                                                                                                                                                                                                                                                                       | Journal | Issue         | Citations (WoS) | Scopus | Altmetric | Views | Category | Access | Keywords                                                                                                   | Review scores |
|-----------------------------------------------------------------------------------------------------------------------|---------------------------------------------------------------------------------------------------------------------------------------------------------------------------------------------------------------------------------------------------------------------------------------------------------------------------------------------------------------------------------------------------------------------------------------------------------------------------------------------------------------------------------------------------------------------------------|---------|---------------|-----------------|--------|-----------|-------|----------|--------|------------------------------------------------------------------------------------------------------------|---------------|
| superspace concepts                                                                                                   |                                                                                                                                                                                                                                                                                                                                                                                                                                                                                                                                                                                 |         | 2014          |                 |        |           |       |          |        | superspace concepts; lattice periodicity                                                                   | (5,3)         |
| Neutron scattering in the biological sciences: progress and prospects                                                 | R. Ashkar, H. Bilheux, H. Bordallo, R. Briber, D. J. E. Callaway, X. Cheng, X.-Q. Chu, J. E. Curtis, M. Dadmun, P. Fenimore, D. Fushman, F. Gabel, K. Gupta, F. Herberle, F. Heinrich, L. Hong, J. Katsaras, Z. Kelman, E. Kharlampieva, G. R. Kneller, A. Kovalevsky, S. Krueger, P. Langan, R. Lieberman, Y. Liu, M. Losche, E. Lyman, Y. Mao, J. Marino, C. Mattos, F. Meilleur, P. Moody, J. D. Nickels, W. B. O'Dell, H. O'Neill, U. Perez-Salas, J. Peters, L. Petridis, A. P. Sokolov, C. Stanley, N. Wagner, M. Weinrich, K. Weiss, T. Wymore, Y. Zhang and J. C. Smith | D       | December 2018 | 43              | 41     | 7         | 4118  | la       |        | neutron scattering; biological systems; structure and dynamics                                             | 4.5 (5,4)     |
| CM01: a facility for cryo-electron microscopy at the European Synchrotron                                             | E. Kandiah, T. Giraud, A. de Maria Antolinos, F. Dobias, G. Effantin, D. Flot, M. Hons, G. Schoehn, J. Susini, O. Svensson, G. A. Leonard and C. Mueller-Dieckmann                                                                                                                                                                                                                                                                                                                                                                                                              | D       | June 2019     | 43              | 51     | 26        | 5050  | fe       | Open   | cryo-TEM; ESRF; PSB; cryo-EM platform; CM01                                                                | 3.0 (3,3,3)   |
| The potential of future light sources to explore the structure and function of matter                                 | E. Weckert                                                                                                                                                                                                                                                                                                                                                                                                                                                                                                                                                                      | IUCrJ   | March 2015    | 42              | 47     | 2         | 14922 | fe       | Open   | synchrotron radiation; future light sources; FELs; coherent radiation                                      | 5.0 (5,5)     |
| Making crystals with a purpose; a journey in crystal engineering at the University of Bologna                         | D. Braga, F. Grepioni, L. Maini and S. d'Agostino                                                                                                                                                                                                                                                                                                                                                                                                                                                                                                                               | IUCrJ   | July 2017     | 40              | 41     | 6         | 6679  | tr       | Open   | cocrystals; solid solutions; polymorphism; luminescence; chirality                                         | 4.0 (4,4)     |
| Hexagonal RMnO <sub>3</sub> : a model system for two-dimensional triangular lattice antiferromagnets                  | H. Sim, J. Oh, J. Jeong, M. D. Le and J.-G. Park                                                                                                                                                                                                                                                                                                                                                                                                                                                                                                                                | B       | February 2016 | 39              | 43     | 27        | 5454  | fe       | Free   | multiferroic materials; ferroelectricity; magnetic structures; magnetic frustration; spin-lattice coupling | 4.0 (4)       |
| Structure-directing effects of ionic liquids in the ionothermal synthesis of metal-organic frameworks                 | T. P. Vaid, S. P. Kelley and R. D. Rogers                                                                                                                                                                                                                                                                                                                                                                                                                                                                                                                                       | IUCrJ   | July 2017     | 39              | 42     | 1         | 7019  | tr       | Open   | metal-organic framework; MOF; ionic liquid; ionothermal synthesis; template                                | 4.5 (5,4)     |
| The solvent component of macromolecular crystals                                                                      | C. X. Weichenberger, P. V. Afonine, K. Kantardjieff and B. Rupp                                                                                                                                                                                                                                                                                                                                                                                                                                                                                                                 | D       | May 2015      | 37              | 38     | 36        | 9762  | fe       |        | macromolecular crystals; solvent content; bulk solvent; ordered solvent                                    | 4.0 (5,4,3)   |
| Cryo-electron microscopy and X-ray crystallography: complementary approaches to structural biology and drug discovery | C. Vénien-Bryan, Z. Li, L. Vuillard and J. A. Boutin                                                                                                                                                                                                                                                                                                                                                                                                                                                                                                                            | F       | April 2017    | 36              | 42     | 29        | 10521 | tr       | Open   | cryo-electron microscopy; cryo-EM; structural biology; high resolution; conformational                     | 2.7 (4,3,1)   |

| Article title                                                                                                             | Author(s)                                                                                                                                                                                                                   | Journal | Issue          | Citations (WoS) | Scopus | Altmetric | Views | Category | Access | Keywords                                                                                                                                | Review scores |
|---------------------------------------------------------------------------------------------------------------------------|-----------------------------------------------------------------------------------------------------------------------------------------------------------------------------------------------------------------------------|---------|----------------|-----------------|--------|-----------|-------|----------|--------|-----------------------------------------------------------------------------------------------------------------------------------------|---------------|
|                                                                                                                           |                                                                                                                                                                                                                             |         |                |                 |        |           |       |          |        | variability; drug discovery                                                                                                             |               |
| High pressure and multiferroics materials: a happy marriage                                                               | E. Gilioli and L. Ehm                                                                                                                                                                                                       | IUCrJ   | November 2014  | 35              | 41     | 1         | 9694  | fe       | Open   | high pressure; multiferroics; materials science                                                                                         | 4.0 (4)       |
| The first X-ray diffraction measurements on Mars                                                                          | D. Bish, D. Blake, D. Vaniman, P. Sarrazin, T. Bristow, C. Achilles, P. Dera, S. Chipera, J. Crisp, R. T. Downs, J. Farmer, M. Gailhanou, D. Ming, J. M. Morookian, R. Morris, S. Morrison, E. Rampe, A. Treiman and A. Yen | IUCrJ   | November 2014  | 35              | 35     | 60        | 17615 | fe       | Open   | X-ray diffraction; Mars; extraterrestrial mineralogy; Curiosity rover                                                                   | 5.0 (5)       |
| Perspectives on Li and transition metal fluoride phosphates as cathode materials for a new generation of Li-ion batteries | E. V. Antipov, N. R. Khasanova and S. S. Fedotov                                                                                                                                                                            | IUCrJ   | January 2015   | 34              | 35     | 4         | 9302  | fe       | Open   | Li-ion batteries; cathode materials; transition metal fluoride phosphates; structure-property relationships                             | 4.0 (4,4)     |
| Contemporary X-ray electron-density studies using synchrotron radiation                                                   | M. R. V. Jørgensen, V. R. Hathwar, N. Bindzus, N. Wahlberg, Y.-S. Chen, J. Overgaard and B. B. Iversen                                                                                                                      | IUCrJ   | September 2014 | 33              | 32     | 2         | 10041 | fe       | Open   | electron-density studies; synchrotron radiation; X-ray diffraction                                                                      | 4.0 (4,4,4)   |
| SLS-2 - the upgrade of the Swiss Light Source                                                                             | A. Streun, T. Garvey, L. Rivkin, V. Schlott, T. Schmidt, P. Willmott and A. Wrulich                                                                                                                                         | JSR     | May 2018       | 33              | 42     | 8         | 5783  | fe       | Open   | synchrotron radiation facility; electron storage ring; low-emittance lattice; undulator; imaging; molecular biology; X-ray spectroscopy | 5.0 (5)       |
| An overview of comparative modelling and resources dedicated to large-scale modelling of genome sequences                 | S. D. Lam, S. Das, I. Sillitoe and C. Orengo                                                                                                                                                                                | D       | August 2017    | 32              | 37     | 8         | 6418  | tr       | Open   | protein structure prediction; template-based modelling; comparative modelling; template selection                                       | 3.5 (5,2)     |
| Real-time powder diffraction studies of energy materials under non-equilibrium conditions                                 | V. K. Peterson, J. E. Auckett and W.-K. Pang                                                                                                                                                                                | IUCrJ   | September 2017 | 31              | 32     | 3         | 6530  | tr       | Open   | real-time studies; operando studies; powder diffraction; functional materials; energy materials                                         | 3.5 (4,3)     |
| Structural chemistry of layered lead halide perovskites containing single octahedral layers                               | J. A. McNulty and P. Lightfoot                                                                                                                                                                                              | IUCrJ   | July 2021      | 31              | 0      | 7         | 5014  | la       | Open   | layered perovskites; symmetry mode analysis; hybrid materials                                                                           | 4.0 (4,4)     |
| Precise implications for real-space pair distribution function                                                            | D. Olds, C. N. Saunders, M. Peters, T. Proffen, J. Neufeind and K. Page                                                                                                                                                     | A       | July 2018      | 30              | 28     | 4         | 5300  | fe       |        | total scattering; pair distribution function;                                                                                           | 2.0 (2)       |

| Article title                                                                                             | Author(s)                                                                              | Journal | Issue          | Citations (WoS) | Scopus | Altmetric | Views | Category | Access | Keywords                                                                                                                                                                                                                        | Review scores |
|-----------------------------------------------------------------------------------------------------------|----------------------------------------------------------------------------------------|---------|----------------|-----------------|--------|-----------|-------|----------|--------|---------------------------------------------------------------------------------------------------------------------------------------------------------------------------------------------------------------------------------|---------------|
| modeling of effects intrinsic to modern time-of-flight neutron diffractometers                            |                                                                                        |         |                |                 |        |           |       |          |        | instrument resolution function; time-of-flight peak shapes                                                                                                                                                                      |               |
| Automated electron diffraction tomography - development and applications                                  | U. Kolb, Y. Krysiak and S. Plana-Ruiz                                                  | B       | August 2019    | 30              | 32     | 4         | 6710  | la       | Open   | electron diffraction tomography; single-crystal structure analysis; disorder analysis; nanomaterials; electron crystallography                                                                                                  | 3.0 (3)       |
| Raw diffraction data preservation and reuse: overview, update on practicalities and metadata requirements | L. M. J. Kroon-Batenburg, J. R. Helliwell, B. McMahon and T. C. Terwilliger            | IUCrJ   | January 2017   | 30              | 28     | 48        | 10943 | tr       | Open   | raw diffraction data; data archiving; metadata descriptors for raw data; diversity of crystallographic instrumentation                                                                                                          | 4.5 (5,4)     |
| Electronic materials with a wide band gap: recent developments                                            | D. Klimm                                                                               | IUCrJ   | September 2014 | 29              | 35     | 3         | 16143 | fe       | Open   | electronic materials; wide band gap materials; semiconductors; silicon; germanium                                                                                                                                               | 4.0 (4,4)     |
| Diffuse scattering and partial disorder in complex structures                                             | T. R. Welberry and D. J. Goossens                                                      | IUCrJ   | November 2014  | 29              | 30     | 1         | 14570 | fe       | Open   | single-crystal diffuse scattering; disorder; synchrotron light sources                                                                                                                                                          | 3.0 (3)       |
| Applications of contact predictions to structural biology                                                 | F. Simkovic, S. Ovchinnikov, D. Baker and D. J. Rigden                                 | IUCrJ   | May 2017       | 28              | 32     | 6         | 11034 | tr       | Open   | evolutionary covariance; predicted contacts; NMR distance restraints; X-ray crystallography; structural bioinformatics                                                                                                          | 4.0 (4)       |
| Covering complete proteomes with X-ray structures: a current snapshot                                     | M. J. Mizianty, X. Fan, J. Yan, E. Chalmers, C. Woloschuk, A. Joachimiak and L. Kurgan | D       | November 2014  | 27              | 29     | 34        | 9044  | fe       | Open   | crystallization propensity; proteome coverage; fDETECT                                                                                                                                                                          | 4.0 (4)       |
| Synchrotron radiation macromolecular crystallography: science and spin-offs                               | J. R. Helliwell and E. P. Mitchell                                                     | IUCrJ   | March 2015     | 27              | 29     | 11        | 12536 | tr       | Open   | automation; microcrystals; storage-ring upgrades; X-ray lasers; neutrons; industrial and commercial access; expanding wavelength range; time-resolved studies; dynamics; diffuse scattering; room-temperature studies; raw data | 2.5 (4,1)     |

| Article title                                                                                                     | Author(s)                                                                                             | Journal | Issue         | Citations (WoS) | Scopus | Altmetric | Views | Category | Access | Keywords                                                                                                                                  | Review scores |
|-------------------------------------------------------------------------------------------------------------------|-------------------------------------------------------------------------------------------------------|---------|---------------|-----------------|--------|-----------|-------|----------|--------|-------------------------------------------------------------------------------------------------------------------------------------------|---------------|
| Advanced electron crystallography through model-based imaging                                                     | S. Van Aert, A. De Backer, G. T. Martinez, A. J. den Dekker, D. Van Dyck, S. Bals and G. Van Tendeloo | IUCrJ   | January 2016  | 27              | 30     | 2         | 8687  | fe       | Open   | transmission electron microscopy; quantitative analysis; statistical parameter estimation; experimental design; structure refinement      | 2.5 (4,1)     |
| A structural overview of the zinc transporters in the cation diffusion facilitator family                         | C. A. Cotrim, R. J. Jarrott, J. L. Martin and D. Drew                                                 | D       | April 2019    | 27              | 32     | 13        | 5280  | tr       | Open   | cation diffusion facilitator; membrane proteins; zinc transporter                                                                         | 4.0 (4,4)     |
| Contributions of charge-density research to medicinal chemistry                                                   | B. Dittrich and C. F. Matta                                                                           | IUCrJ   | November 2014 | 26              | 28     | 2         | 12068 | fe       | Open   | charge-density research; medicinal chemistry; drug design; invariom; Hansen-Coppens multipole model; quantum theory of atoms in molecules | 3.0 (3,3,3)   |
| Copper minerals from volcanic exhalations - a unique family of natural compounds: crystal-chemical review         | I. V. Pekov, N. V. Zubkova and D. Y. Pushcharovsky                                                    | B       | December 2018 | 26              | 30     | 2         | 435   | tr       |        | copper minerals; crystal chemistry; volcanic exhalations; fumarole minerals; oxocentred tetrahedra                                        | 3.5 (4,3)     |
| Pressure effects on lipids and bio-membrane assemblies                                                            | N. J. Brooks                                                                                          | IUCrJ   | November 2014 | 26              | 26     | 244       | 9534  | fe       | Open   | biological membranes; lipids; bilayers; lipid-protein assemblies; high-pressure studies                                                   | 2.0 (3,1)     |
| Modelling the experimental electron density: only the synergy of various approaches can tackle the new challenges | P. Macchi, J.-M. Gillet, F. Taulelle, J. Campo, N. Claiser and C. Lecomte                             | IUCrJ   | July 2015     | 25              | 26     | 2         | 8673  | fe       | Open   | charge density; spin density; momentum density                                                                                            | 3.5 (4,3)     |
| Superspace crystallography: a key to the chemistry and properties                                                 | C. B. Pinheiro and A. M. Abakumov                                                                     | IUCrJ   | January 2015  | 24              | 24     | 3         | 17052 | tr       | Open   | superspace crystallography; modulated structure; incommensurate modulation; chemistry                                                     | 3.0 (3,3)     |
| Multiple-scale structures: from Faraday waves to soft-matter quasicrystals                                        | S. Savitz, M. Babadi and R. Lifshitz                                                                  | IUCrJ   | May 2018      | 24              | 23     | 2         | 4965  | tr       | Open   | quasicrystals; soft matter; pattern formation                                                                                             | 4.5 (5,4)     |
| Lab in a DAC - high-pressure crystal chemistry in a diamond-anvil cell                                            | A. Katrusiak                                                                                          | B       | December 2019 | 24              | 25     | 8         | 12564 | la       |        | extreme conditions; diamond-anvil cell; thermodynamic transformations; chemical reactions                                                 | 4.0 (4)       |

| Article title                                                                                                                                               | Author(s)                                            | Journal | Issue          | Citations (WoS) | Scopus | Altmetric | Views | Category | Access | Keywords                                                                                                                   | Review scores |
|-------------------------------------------------------------------------------------------------------------------------------------------------------------|------------------------------------------------------|---------|----------------|-----------------|--------|-----------|-------|----------|--------|----------------------------------------------------------------------------------------------------------------------------|---------------|
| The `quasi-mosaic' effect in crystals and its applications in modern physics                                                                                | R. Camattari, V. Guidi, V. Bellucci and A. Mazzolari | JAC     | August 2015    | 23              | 22     | 1         | 4215  | fe       |        | quasi-mosaicity; hard X-ray focalization; charged-particle beam steering                                                   | 3.3 (4,3,3)   |
| Computation in electron microscopy                                                                                                                          | E. J. Kirkland                                       | A       | January 2016   | 23              | 23     | 6         | 8451  | la       | Free   | high-resolution transmission electron microscopy; HRTEM; multislice method; exit-wave reconstruction; deconvolution        | 3.0 (4,2)     |
| Functional materials analysis using in situ and in operando X-ray and neutron scattering                                                                    | V. K. Peterson and C. M. Papadakis                   | IUCrJ   | March 2015     | 23              | 25     | 1         | 12602 | tr       | Open   | functional materials; X-ray scattering; neutron scattering; materials characterization                                     | 3.0 (3,3)     |
| Aperiodic crystals and beyond                                                                                                                               | U. Grimm                                             | B       | June 2015      | 22              | 21     | 11        | 9812  | fe       | Free   | aperiodic crystals; incommensurate structures; crystalline order; pattern theory; mathematical diffraction                 | 4.0 (5,3)     |
| Fifteen years of the Protein Crystallography Station: the coming of age of macromolecular neutron crystallography                                           | J. C.-H. Chen and C. J. Unkefer                      | IUCrJ   | January 2017   | 22              | 20     | 8         | 7515  | fe       | Open   | neutron crystallography; Protein Crystallography Station; Los Alamos Neutron Scattering Center; H atoms; enzyme mechanisms | 3.0 (3,3,3)   |
| Recent advances of polyoxometalate-catalyzed selective oxidation based on structural classification                                                         | Q. Chen, C. Shen and L. He                           | C       | November 2018  | 22              | 24     | 2         | 4485  | fe       |        | polyoxometalate; POM; selective oxidation; catalytic activity                                                              | 3.5 (4,3)     |
| Deformable elastic network refinement for low-resolution macromolecular crystallography                                                                     | G. F. Schröder, M. Levitt and A. T. Brunger          | D       | September 2014 | 22              | 22     | 56        | 7835  | fe       | Open   | deformable elastic network refinement; low resolution                                                                      | 3.0 (4,2)     |
| Protein structure prediction by AlphaFold2: are attention and symmetries all you need?                                                                      | N. Bouatta, P. Sorger and M. AlQuraishi              | D       | August 2021    | 22              | 26     | 43        | 31622 | fe       | Open   | AlphaFold2; protein structure prediction; CASP14                                                                           |               |
| Source Function applied to experimental densities reveals subtle electron-delocalization effects and appraises their transferability properties in crystals | C. Gatti, G. Saleh and L. Lo Presti                  | B       | April 2016     | 21              | 23     | 48        | 5322  | fe       | Free   | Source Function; electron delocalization; chemical transferability; chemical bonding; X-ray derived electron density       | 4.5 (5,4)     |
| Beyond simple small-angle X-                                                                                                                                | W. Bras, S. Koizumi and N. J. Terrill                | IUCrJ   | November       | 21              | 22     | 1         | 10590 | fe       | Open   | SAXS; WAXS; SANS;                                                                                                          | 4.0           |

| Article title                                                                                                                             | Author(s)                                                            | Journal | Issue         | Citations (WoS) | Scopus | Altmetric | Views | Category | Access | Keywords                                                                                                                      | Review scores |
|-------------------------------------------------------------------------------------------------------------------------------------------|----------------------------------------------------------------------|---------|---------------|-----------------|--------|-----------|-------|----------|--------|-------------------------------------------------------------------------------------------------------------------------------|---------------|
| ray scattering: developments in online complementary techniques and sample environments                                                   |                                                                      |         | 2014          |                 |        |           |       |          |        | complementary techniques; sample environment                                                                                  | (4,4)         |
| The science is in the data                                                                                                                | J. R. Helliwell, B. McMahon, J. M. Guss and L. M. J. Kroon-Batenburg | IUCrJ   | November 2017 | 20              | 21     | 20        | 7358  | tr       | Open   | raw diffraction data; sharing raw data and its reuse; open science; education; crystallographic science case studies          | 2.0 (2)       |
| A strenuous experimental journey searching for spectroscopic evidence of a bridging nickel-iron-hydride in [NiFe] hydrogenase             | H. Wang, Y. Yoda, H. Ogata, Y. Tanaka and W. Lubitz                  | JSR     | November 2015 | 20              | 20     | 0         | 4332  | fe       | Free   | nuclear resonance vibrational spectroscopy; NRVS; ultra-weak signal; [NiFe] hydrogenase; Ni-R; Ni-H-Fe wag mode; iron hydride | 3.0 (3)       |
| Structure and function of dioxygenases in histone demethylation and DNA/RNA demethylation                                                 | C. Dong, H. Zhang, C. Xu, C. H. Arrowsmith and J. Min                | IUCrJ   | November 2014 | 20              | 23     | 1         | 10752 | fe       | Open   | dioxygenases; histone demethylation; DNA/RNA demethylation; N6-methyladenosine; ALKBH5                                        | 5.0 (5)       |
| Understanding geology through crystal engineering: coordination complexes, coordination polymers and metal-organic frameworks as minerals | I. Huskić and T. Friščić                                             | B       | December 2018 | 19              | 17     | 8         | 5695  | fe       |        | organic minerals; crystal engineering; metal-organic frameworks; MOFs; coordination polymers; hydrogen bonds; cocrystals      | 5.0 (5,5)     |
| A survey of interactions in crystal structures of pyrazine-based compounds                                                                | F. Taghipour and M. Mirzaei                                          | C       | March 2019    | 19              | 18     | 1         | 3861  | fe       |        | pyrazine; magnetic properties; polyoxometalates; multinuclear; hydrogen bonding; metal-organic frameworks; POM; POMOF; MOF    | 2.0 (3,2,1)   |
| Charge density and optical properties of multicomponent crystals containing active pharmaceutical ingredients or their analogues          | M. Gryl                                                              | B       | August 2015   | 17              | 13     | 0         | 6133  | fe       | Free   | crystal engineering; active pharmaceutical ingredients; charge density studies; optical properties; ab initio calculations    | 3.5 (5,2)     |
| Probing droplets on                                                                                                                       | A. Accardo, E. Di Fabrizio, T. Limongi, G.                           | JSR     | July 2014     | 17              | 17     | 2         | 4522  | fe       | Open   | superhydrophobic                                                                                                              |               |

| Article title                                                                                                                                                          | Author(s)                                                                 | Journal | Issue          | Citations (WoS) | Scopus | Altmetric | Views | Category | Access | Keywords                                                                                                  | Review scores |
|------------------------------------------------------------------------------------------------------------------------------------------------------------------------|---------------------------------------------------------------------------|---------|----------------|-----------------|--------|-----------|-------|----------|--------|-----------------------------------------------------------------------------------------------------------|---------------|
| superhydrophobic surfaces by synchrotron radiation scattering techniques                                                                                               | Marinaro and C. Riekell                                                   |         |                |                 |        |           |       |          |        | surface; nanotechnology; biological matter; synchrotron radiation micro- and nanodiffraction              |               |
| Spin ballet for sweet encounters: saturation-transfer difference NMR and X-ray crystallography complement each other in the elucidation of protein-glycan interactions | B. S. Blaum, U. Neu, T. Peters and T. Stehle                              | F       | August 2018    | 17              | 19     | 4         | 3314  | tr       | Open   | saturation-transfer difference NMR; STD-NMR; polyomavirus; carbohydrates; lectins; structural biology     | 2.5 (4,1)     |
| Visualization of biological macromolecules at near-atomic resolution: cryo-electron microscopy comes of age                                                            | A. K. Mitra                                                               | F       | January 2019   | 17              | 3      | 8         | 3040  | tr       |        | cryo-EM; single-particle analysis; three-dimensional reconstruction; phase plates; direct detectors       | 4.0 (5,3)     |
| 'NMR Crystallization': in-situ NMR techniques for time-resolved monitoring of crystallization processes                                                                | K. D. M. Harris, C. E. Hughes, P. A. Williams and G. R. Edwards-Gau       | C       | March 2017     | 16              | 15     | 1         | 780   | tr       |        | NMR crystallography; in-situ NMR; CLASSIC NMR; time-resolved; crystallization processes                   | 3.0 (3,3)     |
| Topological features in crystal structures: a quotient graph assisted analysis of underlying nets and their embeddings                                                 | J.-G. Eon                                                                 | A       | May 2016       | 16              | 15     | 0         | 1103  | la       |        | crystal topology; labelled quotient graphs; ring analysis; building blocks                                | 3.5 (4,3)     |
| Synchrotron X-ray footprinting as a method to visualize water in proteins                                                                                              | S. Gupta, J. Feng, L. J. G. Chan, C. J. Petzold and C. Y. Ralston         | JSR     | September 2016 | 16              | 18     | 5         | 5355  | fe       | Free   | bound water; hydroxyl radical labeling; mass spectrometry; protein conformation; protein modification     |               |
| Why direct and post-refinement determinations of absolute structure may give different results                                                                         | D. J. Watkin and R. I. Cooper                                             | B       | October 2016   | 16              | 15     | 26        | 6669  | fe       | Free   | absolute structure determination; Flack parameter; refinement; software; problem structures               | 4.0 (4,4)     |
| Microfluidic devices for small-angle neutron scattering                                                                                                                | C. G. Lopez, T. Watanabe, M. Adamo, A. Martel, L. Porcar and J. T. Cabral | JAC     | June 2018      | 15              | 15     | 2         | 5169  | fe       |        | microfluidic devices; small-angle neutron scattering; lab-on-a-chip; closed-face polymer photolithography | 2.0 (3,1)     |
| The expanding toolkit for structural biology: synchrotrons, X-ray lasers and cryoEM                                                                                    | S. P. Muench, S. V. Antonyuk and S. S. Hasnain                            | IUCrJ   | March 2019     | 15              | 17     | 15        | 6739  | tr       | Open   | synchrotron crystallography; serial femtosecond                                                           | 2.0 (3,1)     |

| Article title                                                                                           | Author(s)                                                                  | Journal | Issue          | Citations (WoS) | Scopus | Altmetric | Views | Category | Access | Keywords                                                                                                                                                                                                           | Review scores |
|---------------------------------------------------------------------------------------------------------|----------------------------------------------------------------------------|---------|----------------|-----------------|--------|-----------|-------|----------|--------|--------------------------------------------------------------------------------------------------------------------------------------------------------------------------------------------------------------------|---------------|
|                                                                                                         |                                                                            |         |                |                 |        |           |       |          |        | crystallography; cryoEM; MSOX                                                                                                                                                                                      |               |
| Structural and biophysical aspects of l-asparaginases: a growing family with amazing diversity          | J. I. Loch and M. Jaskolski                                                | IUCrJ   | July 2021      | 15              | 0      | 1         | 3575  | fe       | Open   | leukemia; l-asparaginases; amidohydrolases; catalytic mechanism; active site; nucleophiles                                                                                                                         | 4.0 (4)       |
| The many flavours of halogen bonds - message from experimental electron density and Raman spectroscopy  | R. Wang, J. George, S. K. Potts, M. Kremer, R. Dronskowski and U. Englert  | C       | September 2019 | 15              | 16     | 6         | 3414  | fe       | Open   | halogen bonds; experimental electron density; AIM analysis; crystal engineering; crystal structure; Raman spectroscopy                                                                                             | 4.3 (5,4,4)   |
| Industrial cryo-EM facility setup and management                                                        | K. Sader, R. Matadeen, P. Castro Hartmann, T. Halsan and C. Schlichten     | D       | April 2020     | 15              | 18     | 14        | 8019  | fe       | Open   | cryo-EM; facility setup; facility management; industry                                                                                                                                                             | 3.0 (4,2)     |
| Nanocrystalline materials: recent advances in crystallographic characterization techniques              | E. Ringe                                                                   | IUCrJ   | November 2014  | 15              | 18     | 2         | 9236  | fe       | Open   | nanocrystalline materials; plasmonics; shape prediction models                                                                                                                                                     | 3.0 (4,2)     |
| Viruses and viral proteins                                                                              | N. Verdaguer, D. Ferrero and M. R. Murthy                                  | IUCrJ   | November 2014  | 15              | 17     | 4         | 14057 | fe       | Open   | bacteriophages; genome delivery; fusion proteins; RNA-dependent RNA polymerases; viral proteases; viral receptors; viruses                                                                                         | 4.0 (4)       |
| High-pressure crystallography of periodic and aperiodic crystals                                        | C. Hejny and V. S. Minkov                                                  | IUCrJ   | March 2015     | 14              | 11     | 2         | 13260 | fe       | Open   | high-pressure crystallography; periodic crystals; aperiodic crystals; incommensurate modulation                                                                                                                    | 2.5 (3,2)     |
| Application of synchrotron through-the-substrate microdiffraction to crystals in polished thin sections | J. Rius, O. Vallcorba, C. Frontera, I. Peral, A. Crespi and C. Miravittles | IUCrJ   | July 2015      | 14              | 12     | 3         | 7499  | fe       | Open   | tts- $\mu$ XRD; polished thin sections; crystal microvolume; Patterson function direct methods; $\delta$ recycling; synchrotron radiation; two-dimensional frame merging; multocrystal merging; structure solution | 3.0 (3,3)     |
| A perspective on structural and                                                                         | E. Lira-Navarrete and R. Hurtado-Guerrero                                  | F       | August         | 14              | 14     | 4         | 2902  | tr       | Open   | O-fucosylation; protein                                                                                                                                                                                            | 4.0           |

| Article title                                                                                                    | Author(s)                                           | Journal | Issue         | Citations (WoS) | Scopus | Altmetric | Views | Category | Access | Keywords                                                                                                                                                                        | Review scores |
|------------------------------------------------------------------------------------------------------------------|-----------------------------------------------------|---------|---------------|-----------------|--------|-----------|-------|----------|--------|---------------------------------------------------------------------------------------------------------------------------------------------------------------------------------|---------------|
| mechanistic aspects of protein O-fucosylation                                                                    |                                                     |         | 2018          |                 |        |           |       |          |        | O-fucosyltransferases; epidermal growth factor-like repeats; EGF repeats; thrombospondin type I repeats; TSRs; enzyme mechanisms; GDP-fucose                                    | (4,4)         |
| A crystallographic excursion in the extraordinary world of minerals: the case of Cu- and Ag-rich sulfosalts      | L. Bindi and C. Biagioni                            | B       | December 2018 | 14              | 13     | 1         | 368   | tr       |        | copper; silver; sulfosalts; crystal structure; ionic conductivity; minerals                                                                                                     | 3.5 (5,2)     |
| What is the structural chemistry of the living organism at its temperature and pressure?                         | J. R. Helliwell                                     | D       | February 2020 | 14              | 13     | 10        | 4020  | fe       | Open   | structural biology; X-rays; neutrons; electrons                                                                                                                                 | 4.5 (5,4)     |
| New methods in time-resolved Laue pump-probe crystallography at synchrotron sources                              | P. Coppens and B. Fournier                          | JSR     | March 2015    | 14              | 16     | 1         | 7834  | la       | Free   | photocrystallography; pink-Laue; orientation matrix determination; spot integration; multocrystal data sets                                                                     | 3.5 (4,3)     |
| Advances in mass spectrometry based strategies to study receptor tyrosine kinases                                | S. Vyse, H. Desmond and P. H. Huang                 | IUCrJ   | March 2017    | 13              | 13     | 4         | 6552  | tr       | Open   | receptor tyrosine kinase; mass spectrometry; phosphoproteomics; signal transduction; cancer                                                                                     | 3.0 (4,2)     |
| The data universe of structural biology                                                                          | H. M. Berman, B. Vallat and C. L. Lawson            | IUCrJ   | July 2020     | 13              | 17     | 7         | 4833  | tr       | Open   | Protein Data Bank; structural biology; X-ray crystallography; data resources; data standards                                                                                    | 4.0 (4,4)     |
| Solid-state NMR and short-range order in crystalline oxides and silicates: a new tool in paramagnetic resonances | J. F. Stebbins, R. J. McCarty and A. C. Palke       | C       | March 2017    | 13              | 15     | 1         | 632   | tr       |        | nuclear magnetic resonance; solid-state NMR; SSNMR; paramagnetic shift; contact shift; silicates; oxides; transition metals; rare earth cations; crystal structure; geosciences | 4.0 (4)       |
| Synergy between transmission electron microscopy and powder diffraction: application to modulated structures     | D. Batuk, M. Batuk, A. M. Abakumov and J. Hadermann | B       | April 2015    | 13              | 13     | 33        | 6530  | fe       | Free   | transmission electron microscopy; powder diffraction; anion-deficient perovskites; modulated structures                                                                         | 3.0 (3,3,3)   |
| Structural dynamics: review of time-resolved cryo-EM                                                             | M.-E. Mäeots and R. I. Enchev                       | D       | August 2022   | 13              | 15     | 23        | 6544  | tr       | Open   | cryo-EM; time-resolved cryo-EM; sample                                                                                                                                          | 3.7 (4,4,3)   |

| Article title                                                                                                  | Author(s)                                                                          | Journal | Issue         | Citations (WoS) | Scopus | Altmetric | Views | Category | Access | Keywords                                                                                                                                                                   | Review scores |
|----------------------------------------------------------------------------------------------------------------|------------------------------------------------------------------------------------|---------|---------------|-----------------|--------|-----------|-------|----------|--------|----------------------------------------------------------------------------------------------------------------------------------------------------------------------------|---------------|
|                                                                                                                |                                                                                    |         |               |                 |        |           |       |          |        | preparation; structural biology; structural dynamics                                                                                                                       |               |
| Pressure-induced structural phase transformation in cobalt(II) dicyanamide                                     | A. A. Yakovenko, K. W. Chapman and G. J. Halder                                    | B       | June 2015     | 12              | 14     | 55        | 5129  | fe       | Free   | high pressure; magnetic molecular framework material; MOFs                                                                                                                 | 4.0 (4,4)     |
| A modulation wave approach to the order hidden in disorder                                                     | R. Withers                                                                         | IUCrJ   | January 2015  | 12              | 14     | 1         | 6115  | fe       | Open   | modulation wave approach; ordered 'disorder'; crystalline structure; long-range order; short-range order                                                                   | 4.0 (4,4)     |
| Recent advances in isopolyoxotungstates and their derivatives                                                  | Y.-J. Liu, M.-T. Jin, L.-J. Chen and J.-W. Zhao                                    | C       | November 2018 | 12              | 13     | 2         | 2961  | fe       |        | polyoxometalate; isopolyoxotungstate; synthesis; structure; crystal structure                                                                                              | 4.0 (4)       |
| The atacamite family of minerals - a testbed for quantum spin liquids                                          | T. Malcherek, M. D. Welch and P. A. Williams                                       | B       | December 2018 | 12              | 12     | 2         | 762   | tr       |        | Jahn-Teller distortion; spin liquid; geometric frustration; herbertsmithite; paratacamite; clinoatacamite                                                                  | 4.0 (4,4)     |
| Structure solution and refinement of metal-ion battery cathode materials using electron diffraction tomography | J. Hadermann and A. M. Abakumov                                                    | B       | August 2019   | 12              | 12     |           | 1071  | fe       |        | electron diffraction tomography; metal ion; lithium; battery; crystal structure                                                                                            | 3.5 (4,3)     |
| Reconciling the regulatory role of Munc18 proteins in SNARE-complex assembly                                   | A. Rehman, J. K. Archbold, S.-H. Hu, S. J. Norwood, B. M. Collins and J. L. Martin | IUCrJ   | November 2014 | 12              | 15     | 2         | 7183  | fe       | Open   | SM proteins; SNARE proteins; syntaxin; Munc18; membrane trafficking                                                                                                        | 4.0 (4)       |
| A simple graphical method to pinpoint local pseudosymmetries in $Z' > 1$ cases                                 | R. Baggio                                                                          | C       | July 2019     | 12              | 12     | 6         | 1310  | fe       |        | pseudosymmetry; ADDSYM; local symmetry; visual method                                                                                                                      | 4.0 (5,3)     |
| In situ electrochemical synchrotron radiation for Li-ion batteries                                             | T. Alemu and F.-M. Wang                                                            | JSR     | January 2018  | 11              | 10     | 1         | 3622  | tr       |        | in situ; synchrotron radiation; Li-ion battery; X-ray diffraction spectroscopy; transmission X-ray microscopy; X-ray absorption spectroscopy; solid electrolyte interphase | 3.0 (3)       |

| Article title                                                                                                                               | Author(s)                                                                                                                                                  | Journal | Issue         | Citations (WoS) | Scopus | Altmetric | Views | Category | Access | Keywords                                                                                                                                             | Review scores |
|---------------------------------------------------------------------------------------------------------------------------------------------|------------------------------------------------------------------------------------------------------------------------------------------------------------|---------|---------------|-----------------|--------|-----------|-------|----------|--------|------------------------------------------------------------------------------------------------------------------------------------------------------|---------------|
| Observing structural reorientations at solvent-nanoparticle interfaces by X-ray diffraction - putting water in the spotlight                | M. Zobel                                                                                                                                                   | A       | November 2016 | 11              | 14     | 1         | 853   | la       |        | solvent-nanoparticle interfaces; solvent restructuring; hydration shell; liquid structure; pair distribution function                                | 4.0 (4)       |
| Single-crystal-to-single-crystal transformations triggered by dehydration in polyoxometalate-based compounds                                | S. Reinoso, B. Artetxe and J. M. Gutiérrez-Zorrilla                                                                                                        | C       | November 2018 | 11              | 12     | 3         | 4502  | fe       |        | polyoxometalate; POM; crystal-to-crystal transitions; dynamic behaviour; robust frameworks; crystal engineering                                      | 4.0 (5,3)     |
| Cryogenic coherent X-ray diffraction imaging of biological samples at SACLA: a correlative approach with cryo-electron and light microscopy | Y. Takayama and K. Yonekura                                                                                                                                | A       | March 2016    | 11              | 15     | 1         | 4923  | fe       |        | coherent X-ray diffraction imaging; X-ray free-electron lasers; frozen-hydrated non-crystalline samples; structural analysis; correlative microscopy | 4.0 (4,4)     |
| Investigating increasingly complex macromolecular systems with small-angle X-ray scattering                                                 | B. Vestergaard and Z. Sayers                                                                                                                               | IUCrJ   | November 2014 | 11              | 13     | 1         | 6294  | fe       | Open   | biological solution small-angle X-ray scattering (BioSAXS); synchrotron radiation; beamlines; structural complexity; biostructural research          | 3.0 (3,3)     |
| Brightness of synchrotron radiation from undulators and bending magnets                                                                     | G. Geloni, V. Kocharyan and E. Saldin                                                                                                                      | JSR     | March 2015    | 11              | 11     | 2         | 7049  | la       | Free   | brightness; Wigner distribution; undulator radiation; bending magnet radiation                                                                       |               |
| Combining X-rays, neutrons and electrons, and NMR, for precision and accuracy in structure-function studies                                 | J. R. Helliwell                                                                                                                                            | A       | May 2021      | 10              | 7      | 14        | 4054  | la       | Open   | X-rays; neutrons; electrons; NMR; structure and function                                                                                             | 4.5 (5,4)     |
| Mean bond-length variations in crystals for ions bonded to oxygen                                                                           | O. C. Gagné and F. C. Hawthorne                                                                                                                            | B       | December 2017 | 10              | 10     | 1         | 3256  | la       |        | bond length; coordination number; distortion; electronegativity; ionization energy; structural strain; ionic radius; oxide; oxysalt                  | 3.0 (5,1)     |
| Data to knowledge: how to get meaning from your result                                                                                      | H. M. Berman, M. J. Gabanyi, C. R. Groom, J. E. Johnson, G. N. Murshudov, R. A. Nicholls, V. Reddy, T. Schwede, M. D. Zimmerman, J. Westbrook and W. Minor | IUCrJ   | January 2015  | 10              | 10     | 3         | 14982 | fe       | Open   | meaning from data; big data; databases; knowledge bases; data deposition                                                                             | 2.5 (4,1)     |

| Article title                                                                                               | Author(s)                                                               | Journal | Issue          | Citations (WoS) | Scopus | Altmetric | Views | Category | Access | Keywords                                                                                                                                                                                                                             | Review scores |
|-------------------------------------------------------------------------------------------------------------|-------------------------------------------------------------------------|---------|----------------|-----------------|--------|-----------|-------|----------|--------|--------------------------------------------------------------------------------------------------------------------------------------------------------------------------------------------------------------------------------------|---------------|
| Upscaling X-ray nanoimaging to macroscopic specimens                                                        | M. Du, Z. Di, D. Gürsoy, R. P. Xian, Y. Kozorovitskiy and C. Jacobsen   | JAC     | April 2021     | 10              | 11     | 1         | 3767  | la       | Open   | X-ray microscopy; phase contrast X-ray imaging                                                                                                                                                                                       | 3.0 (3)       |
| A survey of the structural models proposed for $\text{PbZr}_{1-x}\text{Ti}_x\text{O}_3$ using mode analysis | B. Kocsis, J. M. Perez-Mato, E. S. Tasci, G. de la Flor and M. I. Aroyo | JAC     | August 2014    | 10              | 10     | 1         | 4805  | fe       |        | lead zirconate titanate; symmetry-mode analysis; structural correlations; multiple phases                                                                                                                                            |               |
| Crystal forms in pharmaceutical applications: olanzapine, a gift to crystal chemistry that keeps on giving  | S. M. Reutzel-Edens and R. M. Bhardwaj                                  | IUCrJ   | November 2020  | 10              | 10     | 8         | 6178  | tr       | Open   | olanzapine; polymorphs; hydrates; crystal forms; pharmaceuticals; crystallization                                                                                                                                                    | 4.0 (4)       |
| What macromolecular crystallogeneses tells us - what is needed in the future                                | R. Giegé                                                                | IUCrJ   | July 2017      | 9               | 10     | 7         | 9279  | fe       | Open   | crystal engineering; crystallization predictors; crystallogeneses; crystallizability; crowding; determinant and antideterminant; evolution; packing; self-assembly rules; supramolecularity; surface patches; symmetry and asymmetry | 1.5 (2,1)     |
| Discerning best practices in XFEL-based biological crystallography - standards for nonstandard experiments  | A. Gorel, I. Schlichting and T. R. M. Barends                           | IUCrJ   | July 2021      | 9               | 0      | 13        | 3622  | fe       | Open   | serial femtosecond crystallography; data analysis; X-ray free-electron lasers; error models; time-resolved crystallography; extrapolated structure-factor amplitudes; structural biology                                             | 2.5 (4,1)     |
| Application of Patterson-function direct methods to materials characterization                              | J. Rius                                                                 | IUCrJ   | September 2014 | 9               | 8      | 1         | 8935  | fe       | Open   | direct methods; PFDM; $\delta$ recycling; S-FFT; S-TF; cluster-based DM; powder diffraction; ab initio structure solution; precession electron diffraction; electron diffraction tomography                                          | 3.0 (3)       |
| MicroED: conception, practice and future opportunities                                                      | M. T. B. Clabbers, A. Shiriaeva and T. Gonen                            | IUCrJ   | March 2022     | 9               | 6      | 15        | 8133  | tr       | Open   | MicroED; cryo-EM; microcrystal electron diffraction; crystallography;                                                                                                                                                                | 2.5 (4,1)     |

| Article title                                                                                                        | Author(s)                                                                                                                                                       | Journal | Issue          | Citations (WoS) | Scopus | Altmetric | Views | Category | Access | Keywords                                                                                                                                 | Review scores |
|----------------------------------------------------------------------------------------------------------------------|-----------------------------------------------------------------------------------------------------------------------------------------------------------------|---------|----------------|-----------------|--------|-----------|-------|----------|--------|------------------------------------------------------------------------------------------------------------------------------------------|---------------|
|                                                                                                                      |                                                                                                                                                                 |         |                |                 |        |           |       |          |        | membrane proteins                                                                                                                        |               |
| Structural biology in the time of COVID-19: perspectives on methods and milestones                                   | M. L. Lynch, E. H. Snell and S. E. J. Bowman                                                                                                                    | IUCrJ   | May 2021       | 9               | 9      | 42        | 11003 | tr       | Open   | structural biology; SARS-CoV-2; X-ray crystallography; cryoelectron microscopy; COVID-19                                                 | 3.5 (5,2)     |
| X-ray constrained wavefunctions based on Hirshfeld atoms. I. Method and review                                       | M. L. Davidson, S. Grabowsky and D. Jayatilaka                                                                                                                  | B       | June 2022      | 9               | 9      | 1         | 2465  | tr       |        | X-ray constrained wavefunction; Hirshfeld atom; halting problem; X-ray wavefunction refinement                                           |               |
| Synchrotron radiation microtomography for high-resolution neurovascular network morphology investigation             | Y. Cao, M. Zhang, H. Ding, Z. Chen, B. Tang, T. Wu, B. Xiao, C. Duan, S. Ni, L. Jiang, Z. Luo, C. Li, J. Zhao, S. Liao, X. Yin, Y. Fu, T. Xiao, H. Lu and J. Hu | JSR     | May 2019       | 8               | 8      | 1         | 1854  | tr       |        | high-resolution; imaging; neurovascular network; 3D                                                                                      | 4.0 (4)       |
| Stochastic polarity formation in molecular crystals, composite materials and natural tissues                         | J. Hulliger, M. Burgener, R. Hesterberg, M. Sommer, K. Brahimí and H. Aboulfadl                                                                                 | IUCrJ   | July 2017      | 8               | 7      | 3         | 3995  | tr       | Open   | stochastic polarity formation; molecular crystals; biomimetic materials; natural tissues; Markov chain processes                         | 4.0 (4,4)     |
| Why is interoperability between the two fields of chemical crystallography and protein crystallography so difficult? | A. Brink and J. R. Helliwell                                                                                                                                    | IUCrJ   | September 2019 | 8               | 8      | 17        | 4003  | tr       | Open   | interoperability; chemical crystallography; macromolecular crystallography; Cambridge Structural Database; Protein Data Bank             | 4.0 (4,4)     |
| Structural biology of coronavirus ion channels                                                                       | F. J. Barrantes                                                                                                                                                 | D       | April 2021     | 7               | 7      | 9         | 3681  | tr       |        | coronaviruses; COVID-19; SARS-CoV-2; cryo-electron microscopy; viroporins; structure-function correlations; viral ion channels           | 3.0 (4,2)     |
| The quaternion-based spatial-coordinate and orientation-frame alignment problems                                     | A. J. Hanson                                                                                                                                                    | A       | July 2020      | 7               | 7      | 5         | 3957  | la       | Open   | data alignment; spatial-coordinate alignment; orientation-frame alignment; quaternions; quaternion frames; quaternion eigenvalue methods | 3.5 (4,3)     |
| Scanning transmission electron diffraction methods                                                                   | A. S. Eggeman                                                                                                                                                   | B       | August 2019    | 7               | 9      |           | 1743  | tr       |        | transmission electron microscopy; scanning                                                                                               | 4.0 (4)       |

| Article title                                                                                                                                    | Author(s)                                  | Journal | Issue         | Citations (WoS) | Scopus | Altmetric | Views | Category | Access | Keywords                                                                                                                       | Review scores |
|--------------------------------------------------------------------------------------------------------------------------------------------------|--------------------------------------------|---------|---------------|-----------------|--------|-----------|-------|----------|--------|--------------------------------------------------------------------------------------------------------------------------------|---------------|
|                                                                                                                                                  |                                            |         |               |                 |        |           |       |          |        | electron diffraction; precession electron diffraction; electron crystallography                                                |               |
| Ion permeation in potassium ion channels                                                                                                         | L. Coates                                  | D       | April 2020    | 7               | 8      | 2         | 3023  | tr       | Open   | ion channels; membrane proteins; X-ray crystallography; anomalous scattering                                                   | 3.5 (4,3)     |
| HUG and SQUEEZE: using CRYSTALS to incorporate resonant scattering in the SQUEEZE structure-factor contributions to determine absolute structure | R. I. Cooper, H. D. Flack and D. J. Watkin | C       | November 2017 | 7               | 6      | 8         | 2859  | fe       |        | disorder; resonant scattering; absolute structure                                                                              | 4.0 (5,3)     |
| Short X-ray pulses from third-generation light sources                                                                                           | A. G. Stepanov and C. P. Hauri             | JSR     | January 2016  | 7               | 8      | 1         | 2626  | la       | Free   | laser slicing; femtosecond X-ray pulses; picosecond X-ray pulses; X-ray pulse compression; X-ray switch                        | 2.0 (3,1)     |
| Bone hierarchical structure: spatial variation across length scales                                                                              | N. K. Wittig and H. Birkedal               | B       | June 2022     | 7               | 7      | 2         | 2657  | tr       |        | bone; biomineralization; hierarchical material; X-ray imaging                                                                  | 4.0 (4,4)     |
| The early history of cryo-cooling for macromolecular crystallography                                                                             | D. J. Haas                                 | IUCrJ   | March 2020    | 6               | 6      | 9         | 5710  | tr       | Open   | cryo-crystallography; cryo-protectant; flash-cooling; X-ray radiation damage; macromolecular crystallography                   | 3.0 (3)       |
| Distortions, deviations and alternative facts: reliability in crystallography                                                                    | W. Clegg                                   | IUCrJ   | January 2021  | 6               | 5      | 36        | 7897  | fe       | Open   | structural distortions; structure interpretation; structure validation; scientific fraud                                       | 5.0 (5)       |
| Cascading time evolution of dissipative structures leading to unique crystalline textures                                                        | T. Hashimoto and H. Murase                 | IUCrJ   | January 2015  | 6               | 6      | 1         | 5638  | fe       | Open   | dissipative structures; shish-kebab structures; extended-chain crystal textures; polymer crystallization                       | 3.0 (3)       |
| X-ray magnetic diffraction under high pressure                                                                                                   | Y. Wang, T. F. Rosenbaum and Y. Feng       | IUCrJ   | July 2019     | 5               | 5      | 1         | 4564  | fe       | Open   | X-ray magnetic diffraction; resonant X-ray orbital scattering; non-resonant X-ray diffraction of charge orders; high pressure; | 3.5 (4,3)     |

| Article title                                                                                              | Author(s)                                                                       | Journal | Issue          | Citations (WoS) | Scopus | Altmetric | Views | Category | Access | Keywords                                                                                                                             | Review scores |
|------------------------------------------------------------------------------------------------------------|---------------------------------------------------------------------------------|---------|----------------|-----------------|--------|-----------|-------|----------|--------|--------------------------------------------------------------------------------------------------------------------------------------|---------------|
|                                                                                                            |                                                                                 |         |                |                 |        |           |       |          |        | cryogenic temperatures; spin-density-wave materials; antiferromagnets                                                                |               |
| The crystal structures of the enzyme hydroxymethylbilane synthase, also known as porphobilinogen deaminase | J. R. Helliwell                                                                 | F       | November 2021  | 5               | 5      | 2         | 1634  | tr       | Open   | hydroxymethylbilane synthase; porphobilinogen deaminase; enzyme-substrate intermediates; reaction mechanisms; structure and function | 4.0 (4,4)     |
| Real space in cryo-EM: the future is local                                                                 | C. M. Palmer and C. H. S. Aylett                                                | D       | February 2022  | 4               | 3      | 4         | 4537  | tr       | Open   | denoising; local resolution; local filtering; noise suppression; real-space measures; real-space filtering; cryo-EM                  | 3.0 (3,3)     |
| Growing a thriving international community for small-angle scattering through collaboration                | J. Trehwella                                                                    | JAC     | August 2021    | 4               | 3      | 1         | 1552  | fe       | Open   | small-angle scattering; SAS; triennial SAS conferences; International Union of Crystallography; IUCr; Guinier Prize; standards       |               |
| Epoxide hydrolysis as a model system for understanding flux through a branched reaction scheme             | Å. Janfalk Carlsson, P. Bauer, D. Dobritsch, S. C. L. Kamerlin and M. Widersten | IUCrJ   | May 2018       | 4               | 5      | 4         | 5157  | fe       | Open   | epoxide hydrolase; stereoselectivity; empirical valence-bond simulations; biocatalysis; reaction flux; trans-methylstyrene oxide     | 3.0 (4,2)     |
| Inflation versus projection sets in aperiodic systems: the role of the window in averaging and diffraction | M. Baake and U. Grimm                                                           | A       | September 2020 | 3               | 3      | 7         | 2432  | tr       | Open   | quasicrystals; projection method; inflation rules; diffraction; hyperuniformity                                                      | 3.5 (4,3)     |
| X-ray techniques for innovation in industry                                                                | K. Lawniczak-Jablonska and J. Cutler                                            | IUCrJ   | November 2014  | 3               | 4      | 1         | 5997  | fe       | Open   | X-ray techniques; industry; innovation                                                                                               | 4.0 (4,4)     |
| Isotopy classes for 3-periodic net embeddings                                                              | S. C. Power, I. A. Baburin and D. M. Proserpio                                  | A       | May 2020       | 3               | 4      | 3         | 3048  | la       | Open   | periodic nets; embedded nets; coordination polymers; isotopy types; crystallographic frameworks                                      | 4.5 (5,4)     |
| The future of biomolecular simulation in the pharmaceutical industry: what                                 | T. Edwards, N. Foloppe, S. A. Harris and G. Wells                               | D       | November 2021  | 3               | 4      | 2         | 2212  | tr       | Open   | biomolecular simulation; molecular docking; in silico drug design;                                                                   | 3.5 (4,3)     |

| Article title                                                                                                                                             | Author(s)                                                                                                                                                                                                   | Journal | Issue         | Citations (WoS) | Scopus | Altmetric | Views | Category | Access | Keywords                                                                                                                                               | Review scores |
|-----------------------------------------------------------------------------------------------------------------------------------------------------------|-------------------------------------------------------------------------------------------------------------------------------------------------------------------------------------------------------------|---------|---------------|-----------------|--------|-----------|-------|----------|--------|--------------------------------------------------------------------------------------------------------------------------------------------------------|---------------|
| we can learn from aerodynamics modelling and weather prediction. Part 1. understanding the physical and computational complexity of in silico drug design |                                                                                                                                                                                                             |         |               |                 |        |           |       |          |        | pharmaceutical industry                                                                                                                                |               |
| Introduction to molecular replacement: a time perspective                                                                                                 | E. Dodson                                                                                                                                                                                                   | D       | July 2021     | 3               | 4      | 7         | 2958  | tr       | Open   | crystallographic theory; molecular replacement; test cases; history; scoring functions; crystallographic equations; crystal phasing                    |               |
| 6-Phosphogluconate dehydrogenase and its crystal structures                                                                                               | S. Hanau and J. R. Helliwell                                                                                                                                                                                | F       | March 2022    | 3               | 2      | 2         | 4252  | tr       | Open   | 6-phosphogluconate dehydrogenase; homotropic cooperativity; induced fit; allostery; structure and function; drug targets; bionanotechnology            |               |
| Remarks on X-ray constrained/restrained wavefunction fitting                                                                                              | H.-B. Bürgi and A. Genoni                                                                                                                                                                                   | B       | June 2022     | 2               | 3      | 1         | 2090  | la       |        | Experimental wavefunction; X-ray constrained wavefunction; X-ray restrained wavefunction                                                               |               |
| 20 years of crystal hits: progress and promise in ultrahigh-throughput crystallization screening                                                          | M. L. Lynch, M. E. Snell, S. A. Potter, E. H. Snell, S. E. J. Bowman and C. S. Bond                                                                                                                         | D       | March 2023    | 1               | 0      | 8         | 1845  | fe       | Open   | macromolecular crystallization; macromolecular crystallography; crystallization facilities; high-throughput crystallization; crystallization screening | 2.0 (3,1)     |
| Machine learning for scattering data: strategies, perspectives and applications to surface scattering                                                     | A. Hinderhofer, A. Greco, V. Starostin, V. Munteanu, L. Pithan, A. Gerlach, F. Schreiber and J. Hajdu                                                                                                       | JAC     | February 2023 | 1               | 1      | 1         | 1530  | tr       | Open   | surface scattering; X-ray diffraction; neutron scattering; machine learning; data analysis                                                             | 3.0 (4,2)     |
| Using crystallography tools to improve vaccine formulations                                                                                               | M. C. A. Fantini, C. L. P. Oliveira, J. L. S. Lopes, T. S. Martins, M. A. Akamatsu, A. G. Trezena, M. T.-D.- Franco, V. F. Botosso, O. A. B. E. Sant'Anna, N. Kardjilov, M. K. Rasmussen and H. N. Bordallo | IUCrJ   | January 2022  | 1               | 1      | 4         | 2882  | tr       | Open   | oral vaccines; porous silica; SAXS; XAS; imaging                                                                                                       | 3.0 (3)       |
| CSD Communications of the                                                                                                                                 | G. M. Ferrence, C. A. Tovee, S. J. W. Holgate, N.                                                                                                                                                           | IUCrJ   | January       | 1               | 1      | 7         | 2895  | tr       | Open   | Cambridge Structural                                                                                                                                   | 4.5           |

| Article title                                                                                                                                               | Author(s)                                                                                                     | Journal | Issue          | Citations (WoS) | Scopus | Altmetric | Views | Category | Access | Keywords                                                                                                                                           | Review scores |
|-------------------------------------------------------------------------------------------------------------------------------------------------------------|---------------------------------------------------------------------------------------------------------------|---------|----------------|-----------------|--------|-----------|-------|----------|--------|----------------------------------------------------------------------------------------------------------------------------------------------------|---------------|
| Cambridge Structural Database                                                                                                                               | T. Johnson, M. P. Lightfoot, K. L. Nowakowska-Orzechowska, S. C. Ward and P. Lightfoot                        |         | 2023           |                 |        |           |       |          |        | Database; CSD Communications; data preservation                                                                                                    | (5,4)         |
| Understanding structural distortions in hybrid layered perovskites with the n = 1 Ruddlesden-Popper structure                                               | T. Liu, N. P. Holzapfel, P. M. Woodward and P. Lightfoot                                                      | IUCrJ   | July 2023      | 1               | 1      | 16        | 1845  | fe       | Open   | perovskites; symmetry mode analysis; organic-inorganic hybrid materials; Ruddlesden-Popper structure                                               | 4.7 (5,5,4)   |
| Trends in coordination of rhenium organometallic complexes in the Protein Data Bank                                                                         | A. Brink, F. J. F. Jacobs and J. R. Helliwell                                                                 | IUCrJ   | March 2022     | 1               | 0      | 3         | 4395  | tr       | Open   | organometallic complexes; proteins; rhenium; technetium; radiopharmaceuticals; radioisotopes; transition metals                                    | 3.7 (4,4,3)   |
| Pathological crystal structures                                                                                                                             | K. N. Raymond and G. S. Girolami                                                                              | C       | September 2023 | 1               | 1      |           | 2124  | tr       | Open   | crystallographic errors; atom misassignments; incorrect modeling; disordered guest molecules; incorrect space group; incorrect cell size; checkCIF | 5.0 (5,5)     |
| Native glycosylation and binding of the antidepressant paroxetine in a low-resolution crystal structure of human myeloperoxidase                            | L. Krawczyk, S. Semwal, J. Soubhye, S. Lemri Ouadriri, M. Prévost, P. Van Antwerpen, G. Roos and J. Bouckaert | D       | September 2022 | 1               | 2      | 4         | 2001  | fe       | Open   | human myeloperoxidase; glycosylation; N-glycan refinement; thiocyanate; paroxetine                                                                 | 2.5 (3,2)     |
| On the centennials of the discoveries of the hydrogen bond and the structure of the water molecule: the short life and work of Eustace Jean Cuy (1897-1925) | Z. S. Derewenda                                                                                               | A       | September 2021 | 0               | 2      | 4         | 729   | fe       |        | hydrogen bond; water molecule structure; history of structural chemistry                                                                           | 2.0 (3,1)     |
| Deep learning applications in protein crystallography                                                                                                       | S. Matinyan, P. Filipcik, J. P. Abrahams and A. Altomare                                                      | A       | January 2024   | 0               | 0      |           | 1068  | la       | Open   | protein crystallography; deep learning; artificial intelligence; machine learning                                                                  | 3.5 (4,3)     |
| Facing the phase problem                                                                                                                                    | W. A. Hendrickson and E. N. Baker                                                                             | IUCrJ   | September 2023 | 0               | 1      |           | 1734  | la       | Open   | anomalous diffraction; density modification; direct methods; isomorphous replacement; molecular replacement                                        | 4.0 (4,4)     |

| Article title                                                                                        | Author(s)                                                                                                                                                                                                                                                                                                         | Journal | Issue          | Citations (WoS) | Scopus | Altmetric | Views | Category | Access | Keywords                                                                                                                                            | Review scores |
|------------------------------------------------------------------------------------------------------|-------------------------------------------------------------------------------------------------------------------------------------------------------------------------------------------------------------------------------------------------------------------------------------------------------------------|---------|----------------|-----------------|--------|-----------|-------|----------|--------|-----------------------------------------------------------------------------------------------------------------------------------------------------|---------------|
| Going around the Kok cycle of the water oxidation reaction with femtosecond X-ray crystallography    | A. Bhowmick, P. S. Simon, I. Bogacz, R. Hussein, M. Zhang, H. Makita, M. Ibrahim, R. Chatterjee, M. D. Doyle, M. H. Cheah, P. Chernev, F. D. Fuller, T. Fransson, R. Alonso-Mori, A. S. Brewster, N. K. Sauter, U. Bergmann, H. Dobbek, A. Zouni, J. Messinger, J. Kern, V. K. Yachandra, J. Yano and T. Ishikawa | IUCrJ   | November 2023  | 0               | 0      |           | 1883  | tr       | Open   | photosystem II; oxygen evolving complex; manganese metalloenzymes; water-oxidation; water-splitting; X-ray free-electron lasers; X-ray spectroscopy | 3.5 (4,3)     |
| Structure and function relationship of formate dehydrogenases: an overview of recent progress        | A. Kobayashi, M. Taketa, K. Sowa, K. Kano, Y. Higuchi, H. Ogata and J. L. Smith                                                                                                                                                                                                                                   | IUCrJ   | September 2023 | 0               | 0      |           | 569   | tr       | Open   | formate dehydrogenases; biotechnological applications; Methylobacterium extorquens AM1; Mo/W enzymes                                                | 4.0 (4)       |
| The interoperability of crystallographic data and databases                                          | A. Brink, I. Bruno, J. Helliwell, B. McMahon and P. Lightfoot                                                                                                                                                                                                                                                     | IUCrJ   | January 2024   | 0               | 0      |           | 1448  | fe       | Open   | interoperability; data; databases; interdisciplinarity; cross-domain integration; CODATA                                                            | 3.5 (4,3)     |
| The African Light Source: history, context and future                                                | S. H. Connell, K. Dollman, G. Kamel, S. A. Khan, E. Mitchell, S. K. Mtingwa, M. C. Newton, P. Ngabonziza, E. Nji, L. Norris, M. Zema and K. Kvashnina                                                                                                                                                             | JSR     | January 2024   | 0               | 0      |           | 948   | fe       | Open   | African Light Source; AfLS; synchrotron; history                                                                                                    | 5.0 (5)       |
| Emergence of liquid following laser melting of gold thin films                                       | I. K. Robinson, J. P. Griffiths, R. Koch, T. A. Assefa, A. F. Suzana, Y. Cao, S. Kim, D. Kim, H. Lee, S. Kim, J. H. Lee, S.-Y. Park, I. Eom, J. Park, D. Nam, S. Kim, S. H. Chun, H. Hyun, K.-S. Kim, M. Lu, C. Song, H. Kim, S. J. L. Billinge, E. S. Bozin and V. K. Peterson                                   | IUCrJ   | November 2023  | 0               | 0      |           | 943   | tr       | Open   | ultrafast X-ray diffraction; laser melting; pair distribution functions; inhomogeneous melting; liquid structure factors                            | 2.5 (3,2)     |
| Correcting systematic errors in diffraction data with modern scaling algorithms                      | L. A. Aldama, K. M. Dalton, D. R. Hekstra and D. G. Waterman                                                                                                                                                                                                                                                      | D       | September 2023 | 0               | 0      |           | 603   | tr       | Open   | X-ray crystallography; scaling; variational inference; deep learning                                                                                | 4.0 (5,3)     |
| From femtoseconds to minutes: time-resolved macromolecular crystallography at XFELs and synchrotrons | N. Caramello, A. Royant and C. Mueller-Dieckmann                                                                                                                                                                                                                                                                  | D       | February 2024  | 0               | 0      |           | 482   | fe       | Open   | time-resolved serial crystallography; synchrotrons; XFELs; structural photobiology; reaction-intermediate states; bacteriorhodopsin; cryo-trapping  | 3.7 (4,4,3)   |
| Advice on describing Bayesian analysis of neutron and X-ray reflectometry                            | A. R. McCluskey, A. J. Caruana, C. J. Kinane, A. J. Armstrong, T. Arnold, J. F. K. Cooper, D. L. Cortie, A. V. Hughes, J.-F. Moulin, A. R. J. Nelson, W. Potrzebowski, V. Starostin and A.                                                                                                                        | JAC     | February 2023  | 0               | 0      | 5         | 997   | fe       | Open   | reflectometry; reflectivity; Bayesian analysis; FAIR data standards                                                                                 | 4.7 (5,5,4)   |
